# Supplementary material for: Dual emission of a bis(pyrene)-functionalized, perbenzylated β-cyclodextrin
Source: Royal Society of Chemistry journal article supplement (doi:10.1039/b803144d), 2008-01-01
Supplement: b803144d.pdf [file b803144d.pdf]

## Supporting Information

### Dual Emission of a Bis(Pyrene)-Functionalized, Perbenzylated $\beta$ -Cyclodextrin

Cheng Huo, Jean-Claude Chambron,\* Michel Meyer

*Institut de Chimie Moléculaire de l'Université de Bourgogne (ICMUB, UMR CNRS n° 5260)*

*Université de Bourgogne, 9 avenue Alain Savary, BP 47870, 21078 Dijon cedex (France)*

#### Table of Contents

|                                                                                                                                       |    |
|---------------------------------------------------------------------------------------------------------------------------------------|----|
| <b>Figure S 1:</b> Detail (aliphatic region) of the $^1\text{H}/^1\text{H}$ COSY map of <b>1</b> .....                                | 2  |
| <b>Figure S 2:</b> Detail (aliphatic region) of the TOCSY map of <b>1</b> .....                                                       | 3  |
| <b>Figure S 3:</b> Selected regions of the $^1\text{H}/^1\text{H}$ ROESY map of <b>1</b> .....                                        | 4  |
| <b>Figure S 4:</b> $^{13}\text{C}/^1\text{H}$ HSQC map of <b>1</b> .....                                                              | 5  |
| <b>Figure S 5:</b> Detail (aliphatic region) of the $^{13}\text{C}/^1\text{H}$ HSQC map of <b>1</b> .....                             | 6  |
| <b>Figure S 6:</b> $^{13}\text{C}/^1\text{H}$ HMBC map of <b>1</b> .....                                                              | 7  |
| <b>Figure S 7:</b> Detail (aromatic region) of the $^{13}\text{C}/^1\text{H}$ HMBC map of <b>1</b> .....                              | 8  |
| <b>Figure S 8:</b> Detail (aliphatic region) of the $^{13}\text{C}/^1\text{H}$ HMBC map of <b>1</b> .....                             | 9  |
| <b>Figure S 9:</b> $^1\text{H}$ NMR spectrum of <b>1</b> in various solvents.....                                                     | 10 |
| <b>Figure S 10:</b> $^1\text{H}$ NMR spectrum of <b>1</b> .....                                                                       | 11 |
| <b>Figure S 11:</b> Comparison of the $^1\text{H}$ NMR spectra of 1-hydroxypyrene and <b>3</b> with that of <b>1</b> .....            | 12 |
| <b>Figure S 12:</b> Electronic absorption spectrum of <b>1</b> in DMSO.....                                                           | 13 |
| <b>Figure S 13:</b> Photograph of the fluorescence of a solution of <b>1</b> in $\text{H}_2\text{O}/\text{DMSO}$ mixtures.....        | 13 |
| <b>Figure S 14:</b> Electronic absorption spectra of solutions of <b>1</b> in selected $\text{H}_2\text{O}/\text{DMSO}$ mixtures..... | 14 |
| <b>Figure S 15:</b> Photograph of the fluorescence of <b>1</b> upon addition of 1-heptanoic acid.....                                 | 15 |
| <b>Figure S 16:</b> Fluorescence spectra of <b>1</b> upon addition of 1-decanoic acid.....                                            | 15 |
| <b>Figure S 17:</b> Fluorescence spectra of <b>1</b> upon addition of 6-chloro-1-hexanol.....                                         | 16 |
| <b>Figure S 18:</b> Fluorescence spectra of <b>1</b> upon addition of 1-decanol.....                                                  | 16 |
| <b>Chart S 1:</b> The various substrates investigated.....                                                                            | 17 |
| <b>Figure S 19:</b> Fluorescence spectra of <b>1</b> in the presence of the compounds of Chart S 1.....                               | 18 |

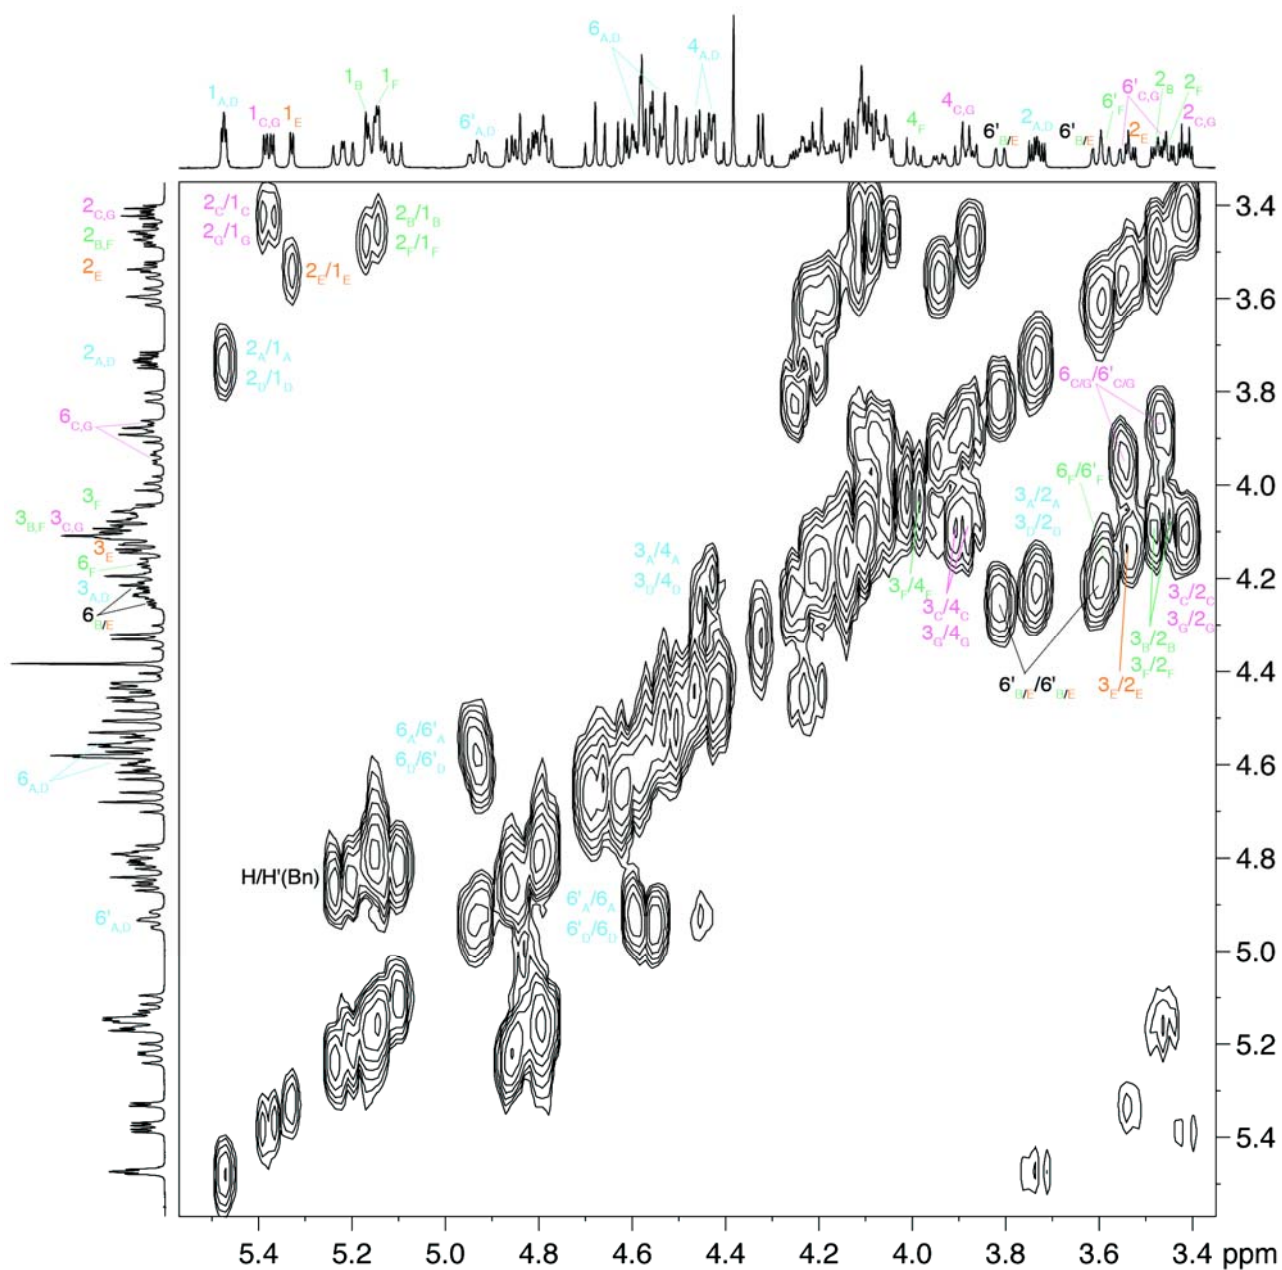

**Figure S 1:** Detail (aliphatic region) of the  $^1\text{H}/^1\text{H}$  COSY map of **1** (600 MHz,  $d^6$ -acetone).



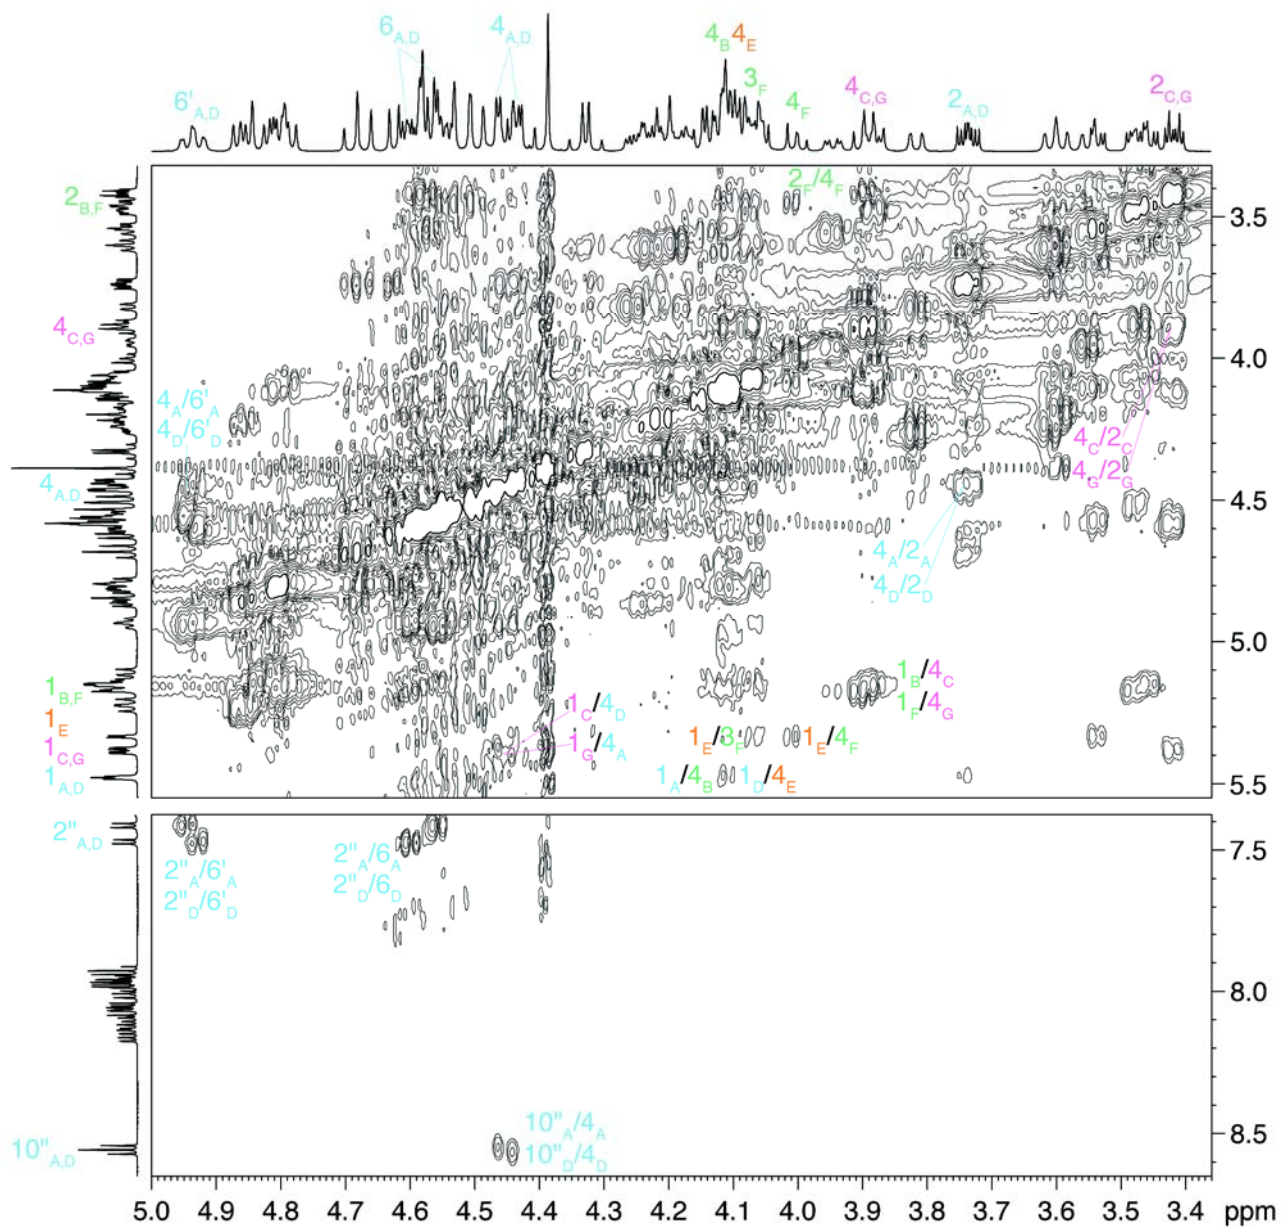

**Figure S 3:** Selected regions of the  $^1\text{H}/^1\text{H}$  ROESY map of **1** (600 MHz,  $d^6$ -acetone, mixing time: 300 ms).

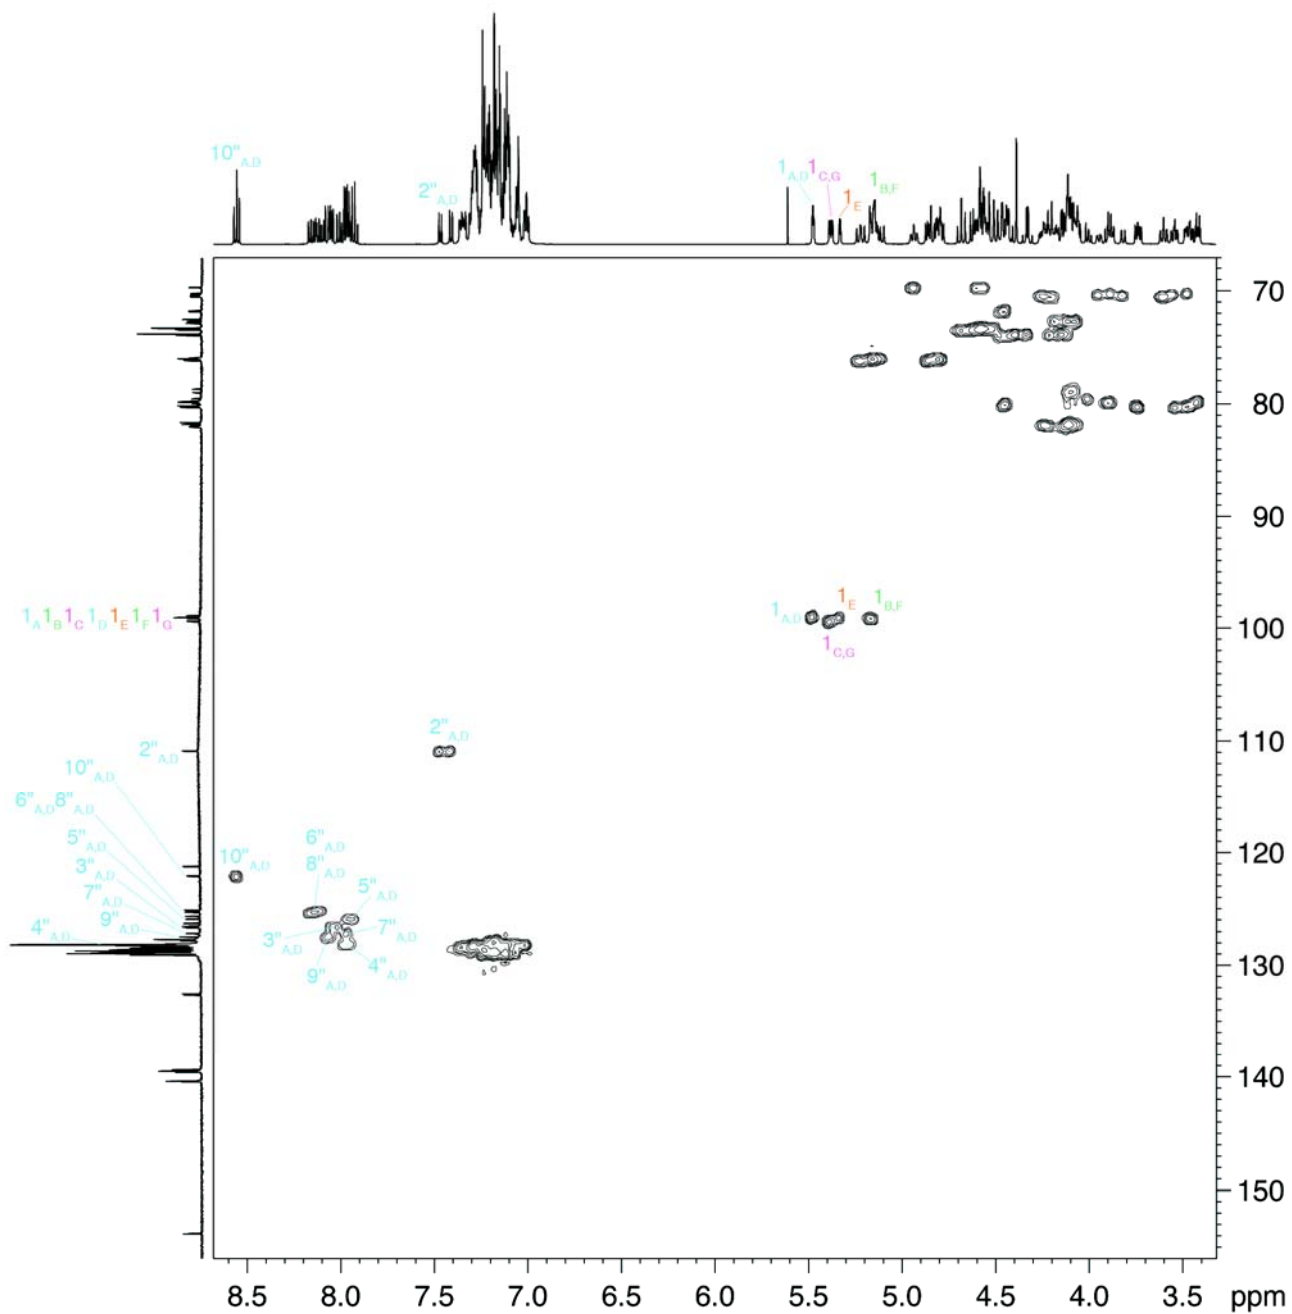

**Figure S 4:**  $^{13}\text{C}/^1\text{H}$  HSQC map of **1** (600 MHz,  $\text{d}^6$ -acetone).

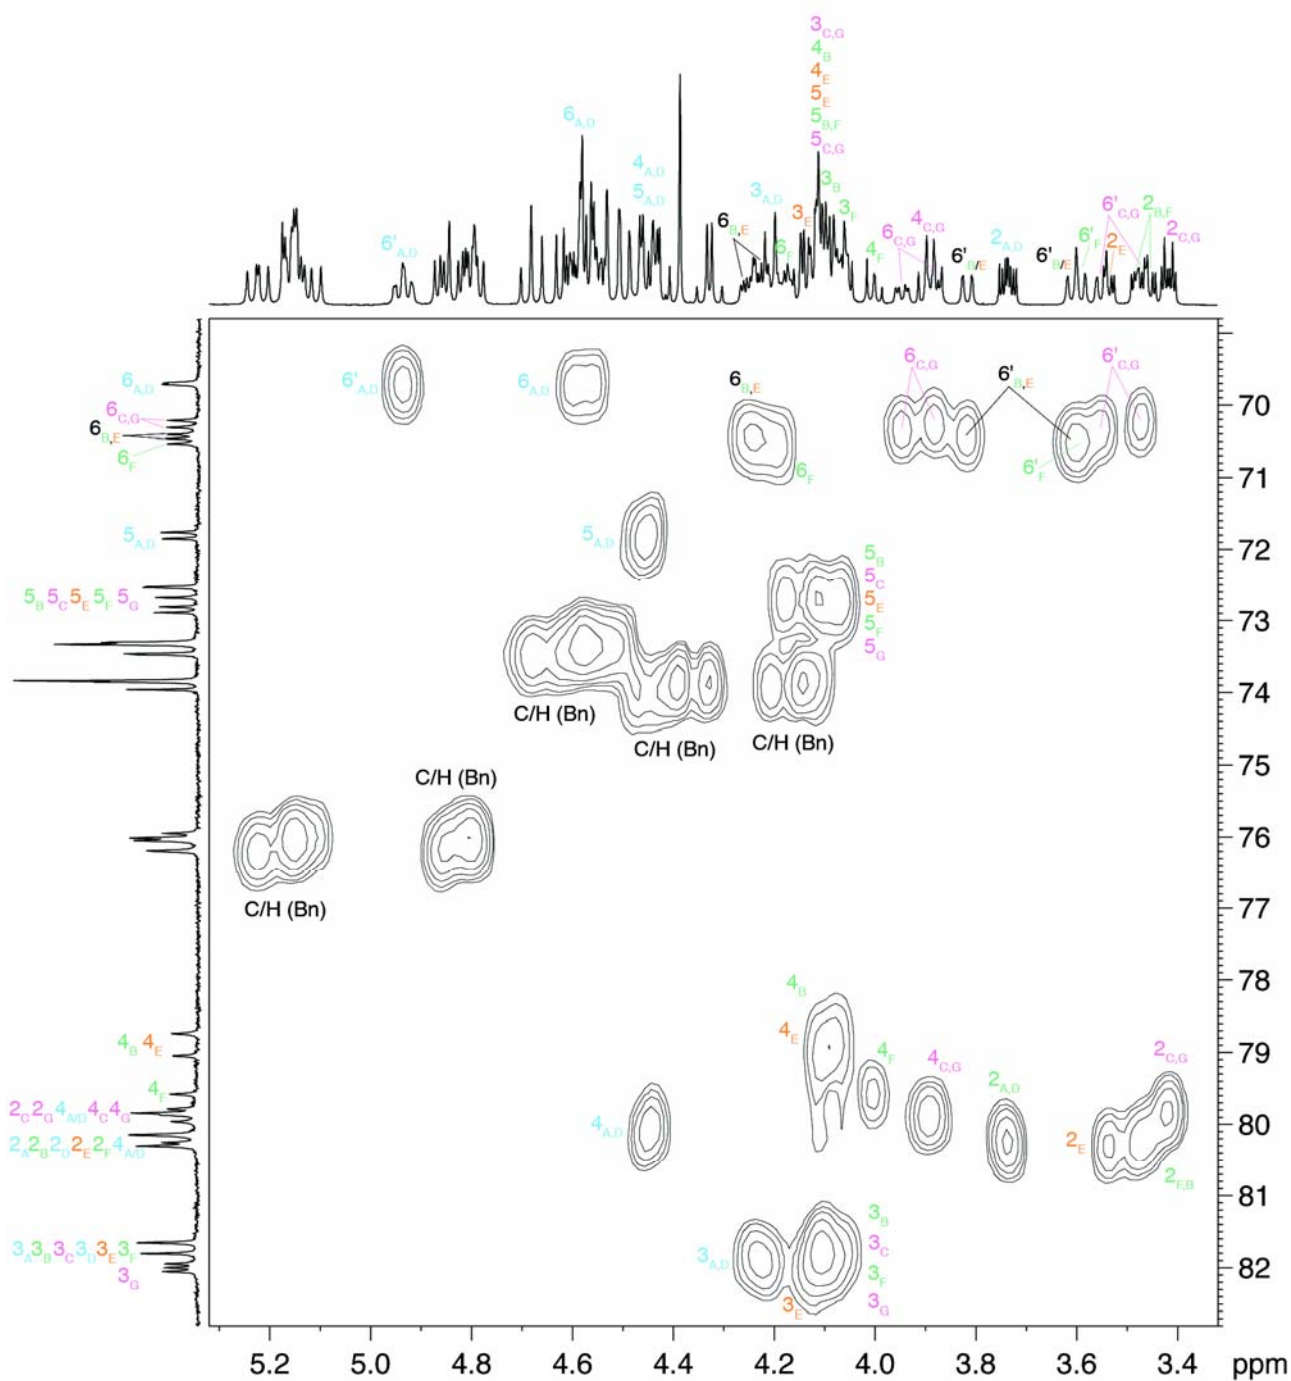

**Figure S 5:** Detail (aliphatic region) of the  $^{13}\text{C}/^1\text{H}$  HSQC map of **1** (600 MHz,  $d^6$ -acetone).

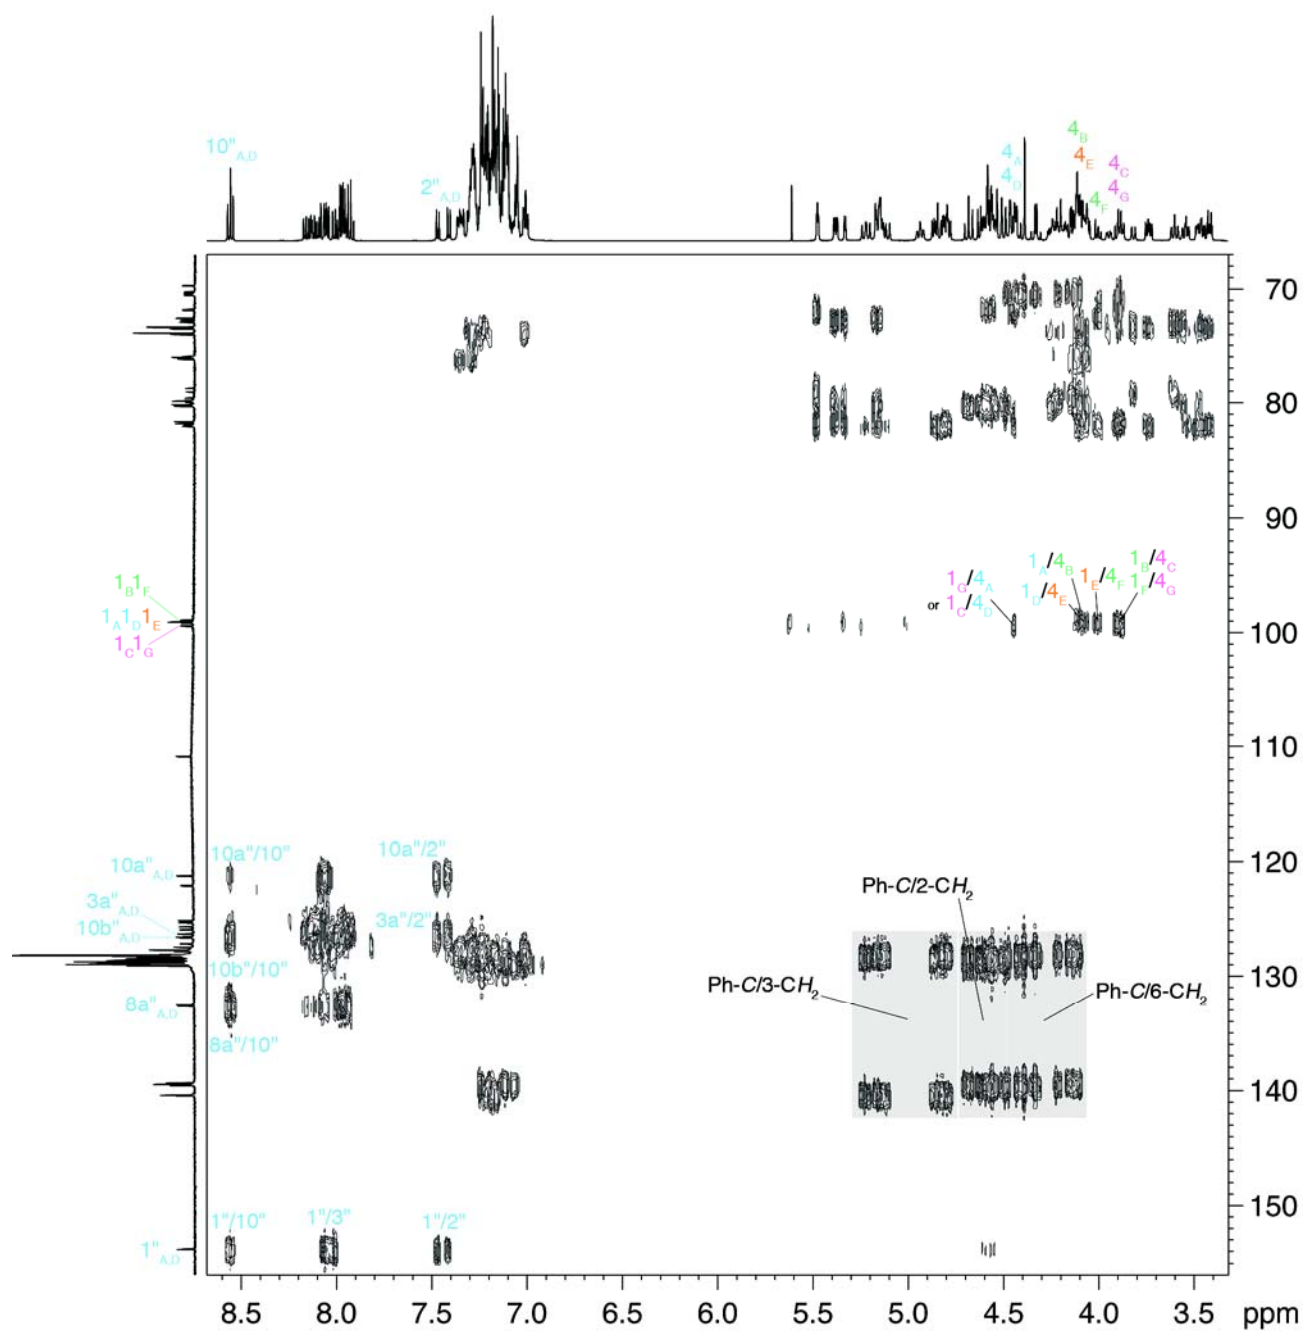

Figure S 6:  $^{13}\text{C}/^1\text{H}$  HMBC map of **1** (600 MHz,  $\text{d}^6$ -acetone).

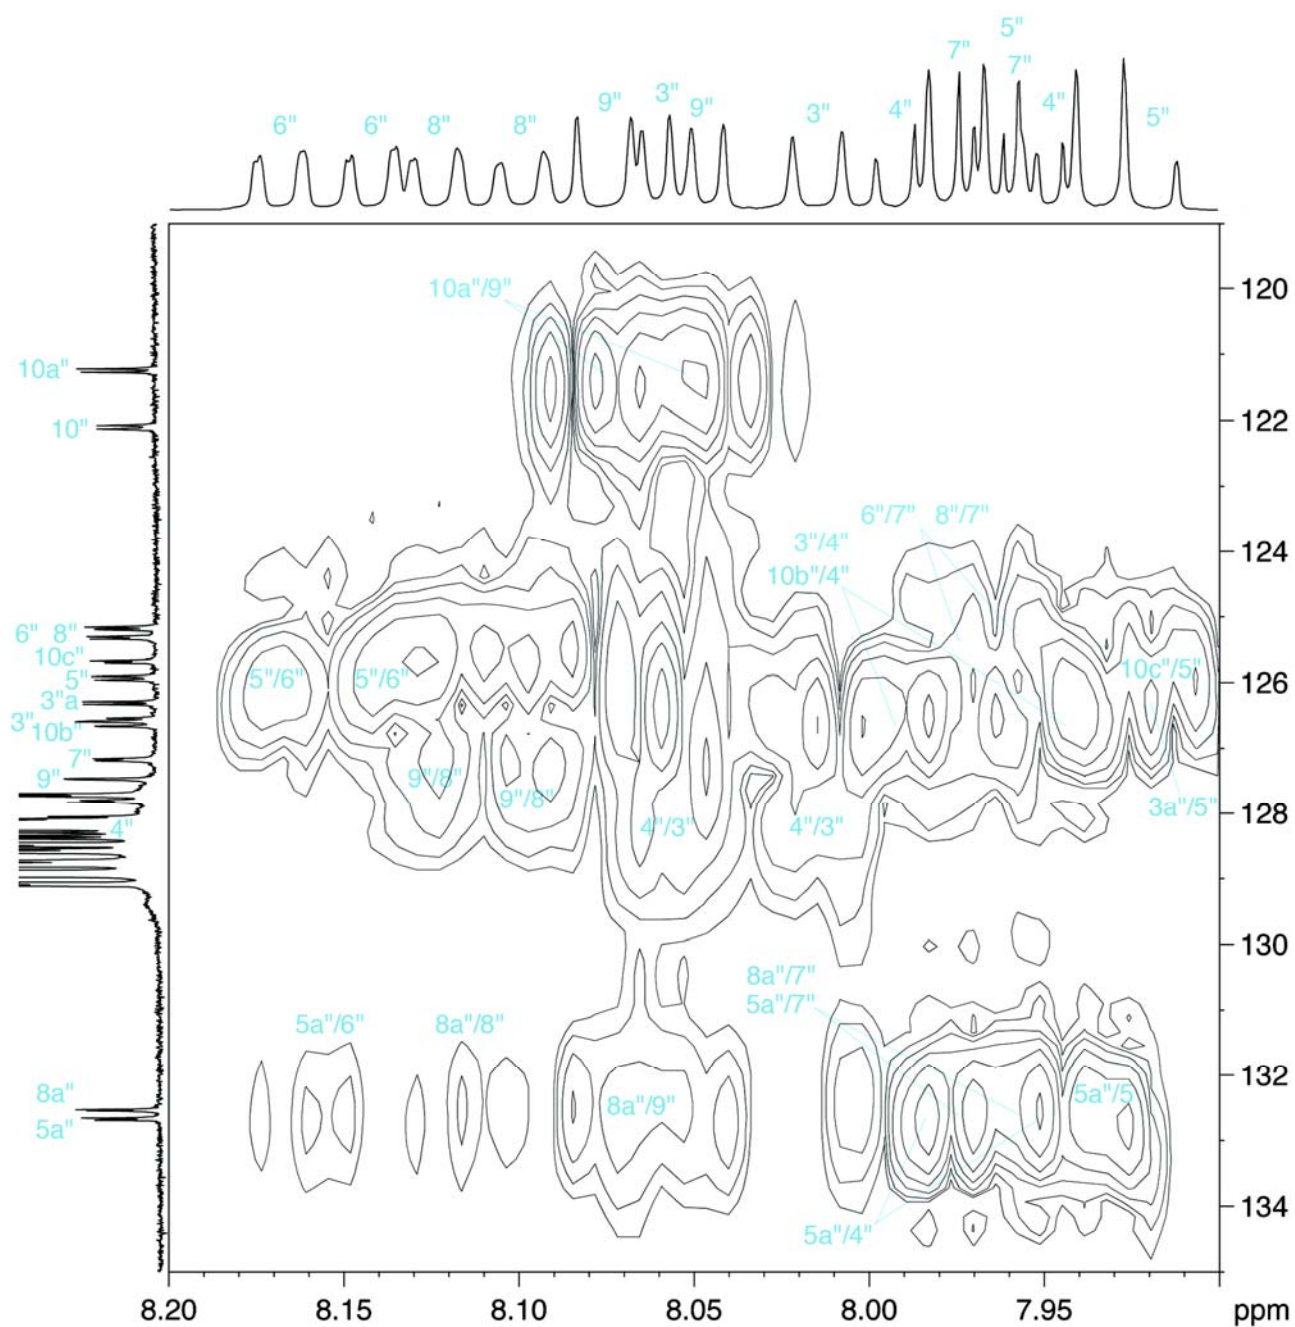

**Figure S 7:** Detail (aromatic region) of the  $^{13}\text{C}/^1\text{H}$  HMBC map of **1** (600 MHz,  $\text{d}^6$ -acetone).



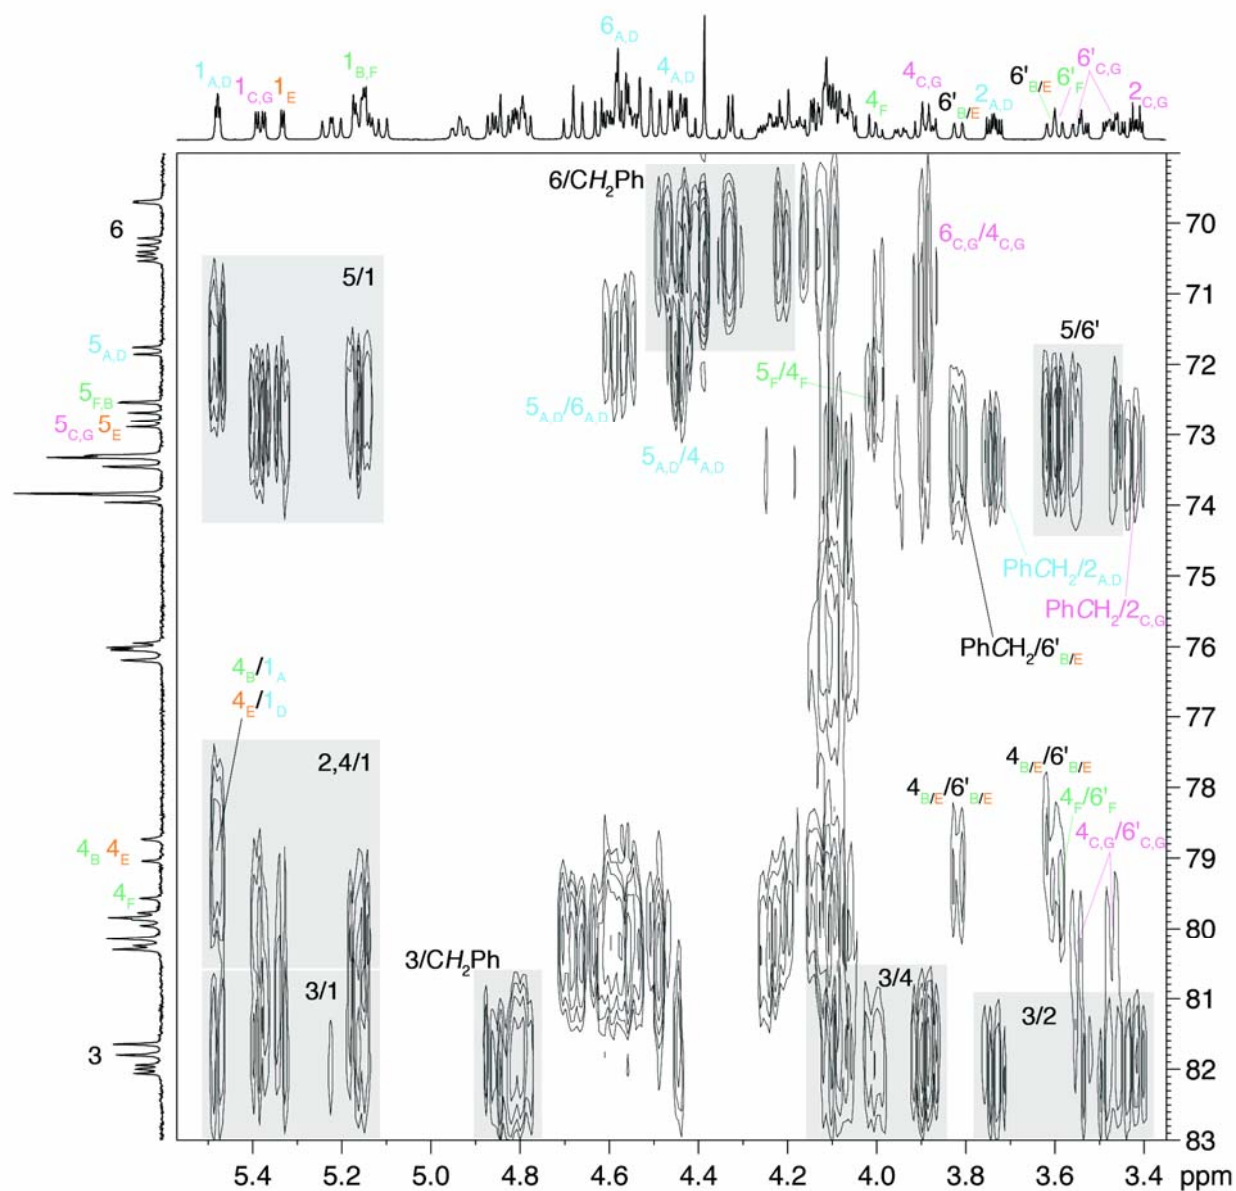

**Figure S 8:** Detail (aliphatic region) of the  $^{13}\text{C}/^1\text{H}$  HMBC map of **1** (600 MHz,  $d^6$ -acetone).

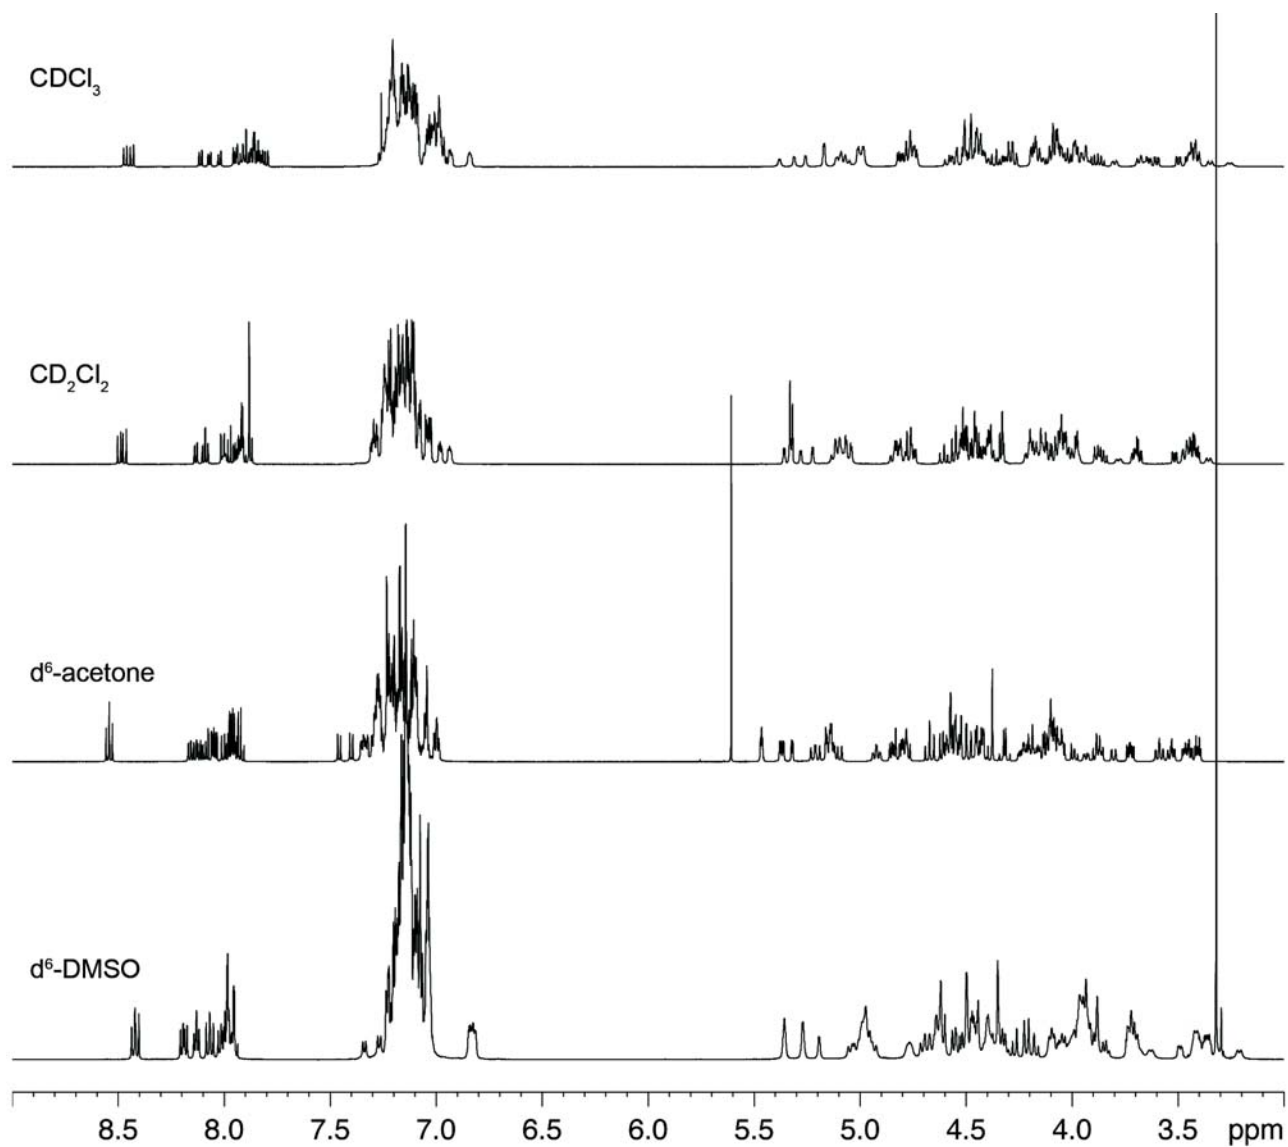

**Figure S 9:**  $^1\text{H}$  NMR (600 MHz) spectrum of **1** in various solvents.

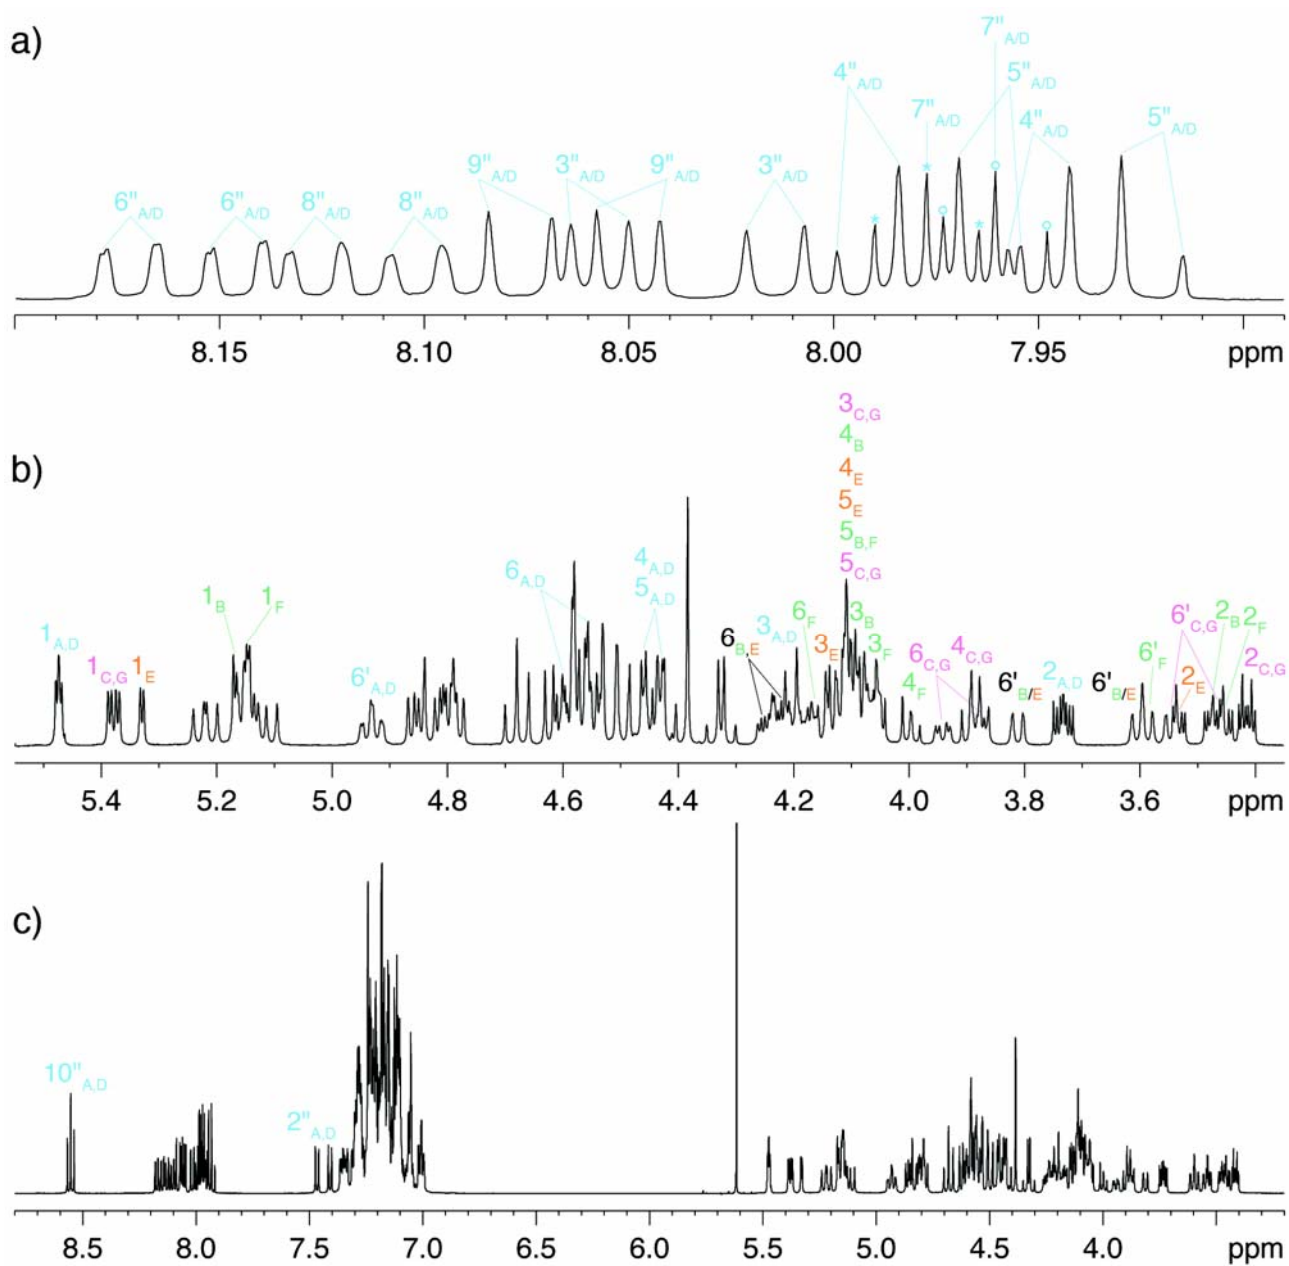

**Figure S 10:**  $^1\text{H}$  NMR spectrum of **1** (600 MHz,  $d^6$ -acetone). a) Aromatic region (\* and o show the triplets of  $7''_{A/D}$ ). b) Aliphatic region. c) Full spectrum.

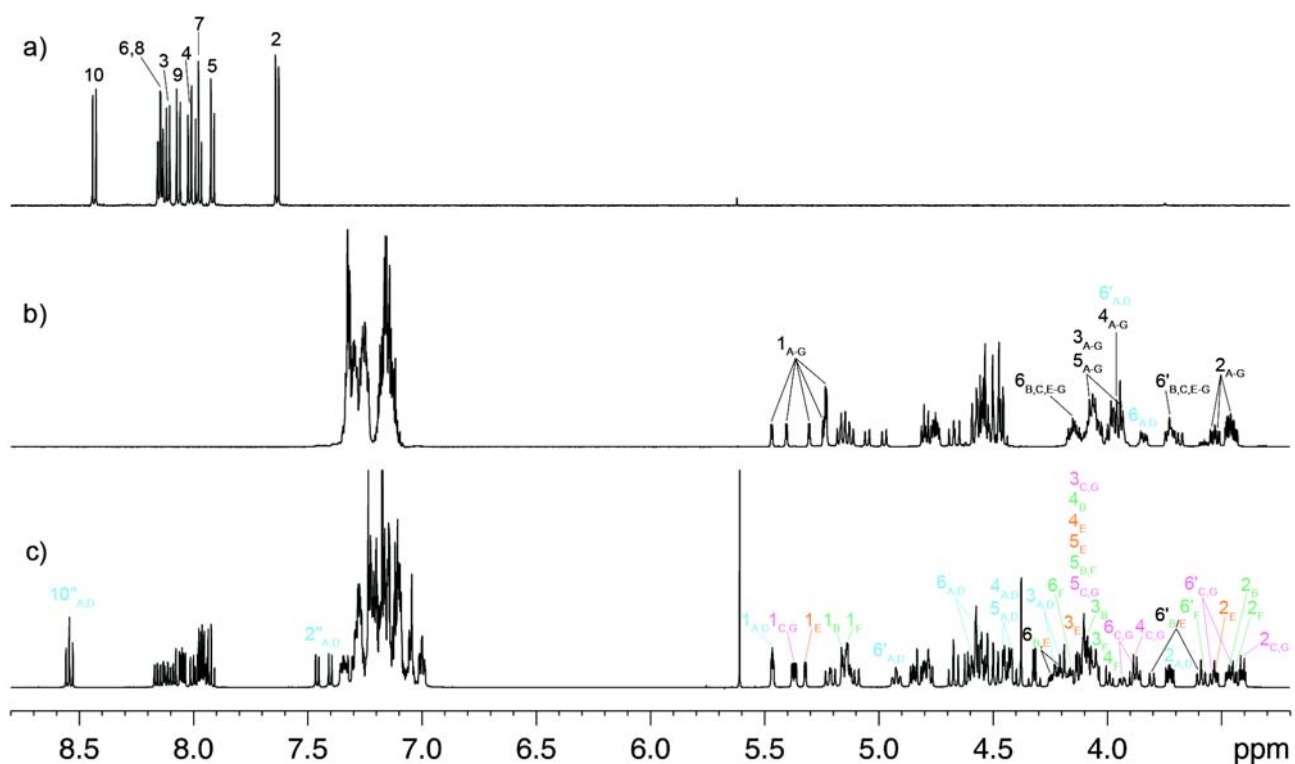

**Figure S 11:** Comparison of the  $^1\text{H}$  NMR spectra of 1-hydroxypyrene (a) and **3** (b) with the spectrum of **1** (600 MHz,  $d^6$ -acetone).

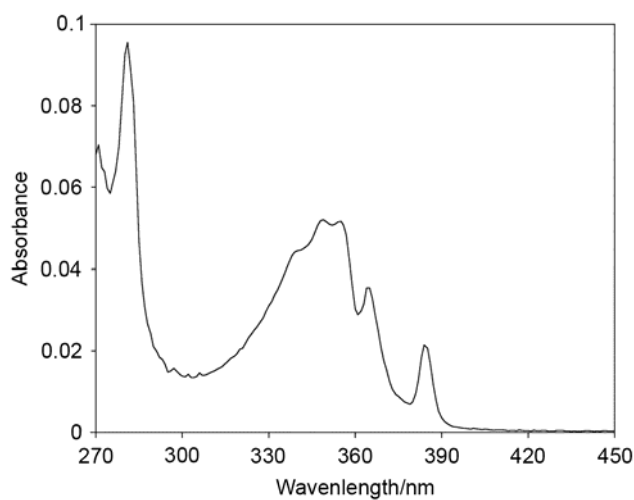

**Figure S 12:** Electronic absorption spectrum of **1** ( $1.0 \times 10^{-6} \text{ mol dm}^{-3}$ ) in DMSO.

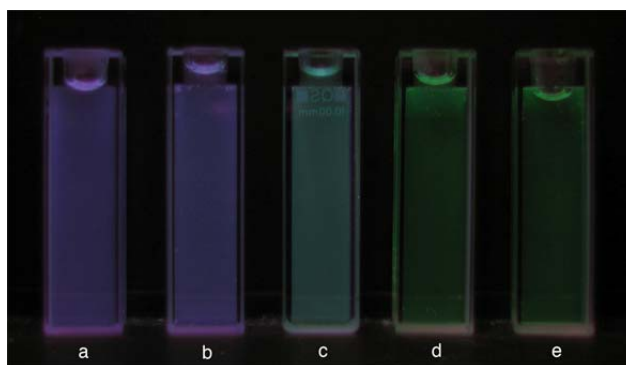

**Figure S 13:** Fluorescence emission from a solution of **1** ( $1.0 \times 10^{-6} \text{ mol dm}^{-3}$ ) in H<sub>2</sub>O/DMSO mixtures with increasing water concentration (a: pure DMSO, b: 15%, c: 18%, d: 20%, e: 40%) under a UV lamp (365 nm).

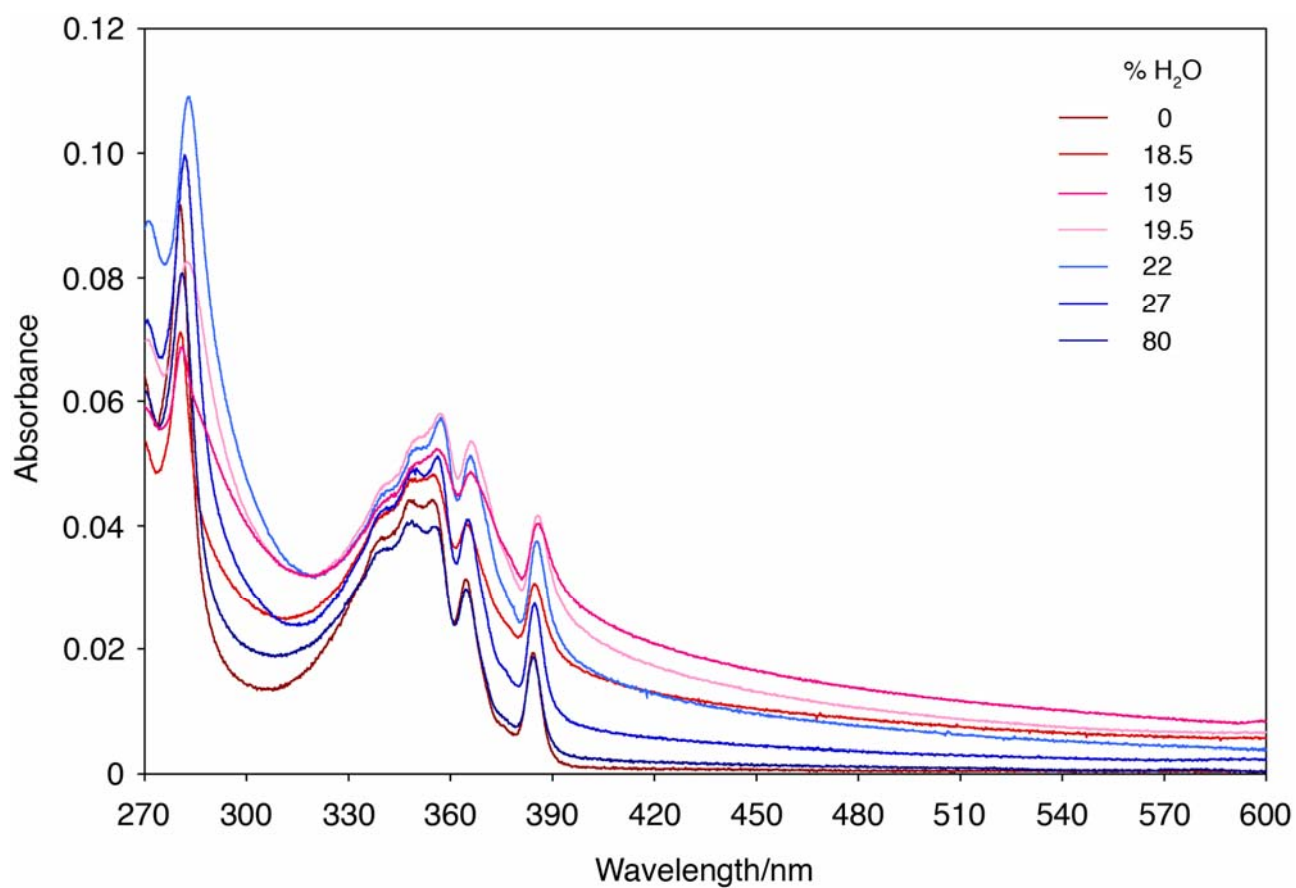

**Figure S 14:** Electronic absorption spectra of solutions of **1** ( $\sim 1.0 \times 10^{-6} \text{ mol dm}^{-3}$ ) in selected H<sub>2</sub>O/DMSO mixtures.

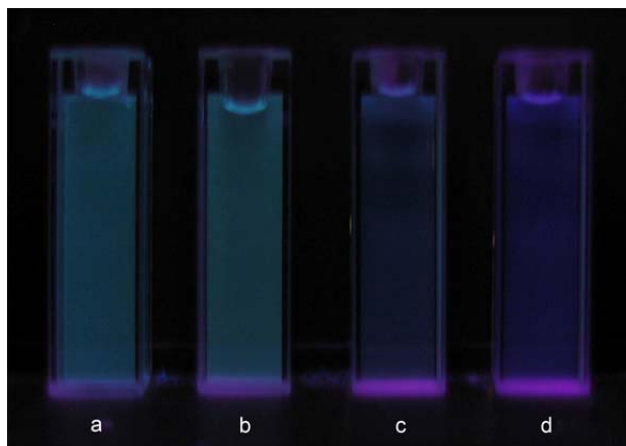

**Figure S 15:** Fluorescence emission of **1** ( $1.0 \times 10^{-6} \text{ mol dm}^{-3}$ ) in  $\text{H}_2\text{O}/\text{DMSO}$  80:20 v/v upon addition of 1-heptanoic acid (a: 0, b:  $1.0 \times 10^{-2}$ , c:  $2.0 \times 10^{-2}$ , d:  $3.0 \times 10^{-2} \text{ mol dm}^{-3}$ ) under a UV lamp (365 nm).

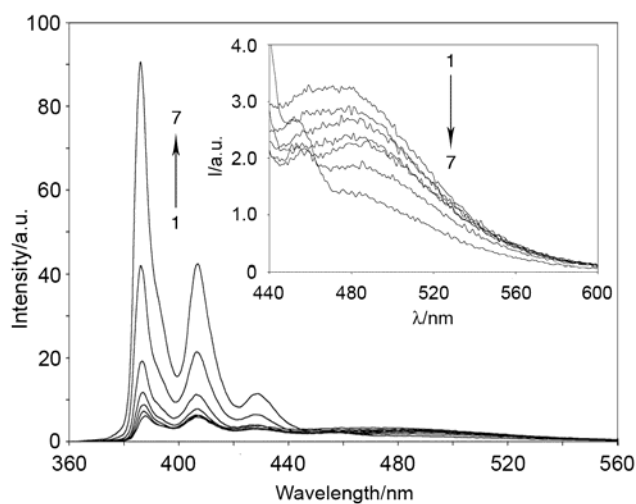

**Figure S 16:** Fluorescence spectra of **1** ( $1.0 \times 10^{-6} \text{ mol dm}^{-3}$ , 25 °C) upon addition of 1-decanoic acid (1: 0, 2:  $2.0 \times 10^{-4}$ , 3:  $4.0 \times 10^{-4}$ , 4:  $6 \times 10^{-4}$ , 5:  $8.0 \times 10^{-4}$ , 6:  $1 \times 10^{-3}$ , 7:  $1.2 \times 10^{-3} \text{ mol dm}^{-3}$ ) in  $\text{H}_2\text{O}/\text{DMSO}$  80:20 v/v containing 0.04% aqueous HCl. The inset shows the excimer emission band.

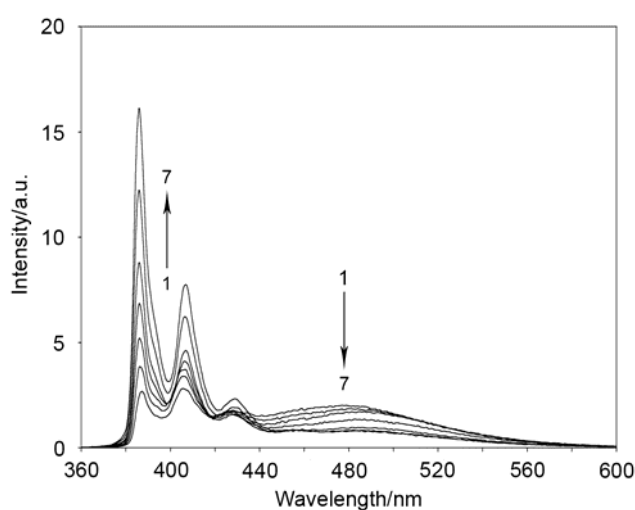

**Figure S 17:** Fluorescence spectra of **1** ( $1.0 \times 10^{-6}$  mol dm<sup>-3</sup>, 25 °C) upon addition of 6-chloro-1-hexanol (1: 0, 2:  $5.0 \times 10^{-3}$ , 3:  $1.0 \times 10^{-2}$ , 4:  $1.5 \times 10^{-2}$ , 5:  $2.0 \times 10^{-2}$ , 6:  $2.5 \times 10^{-2}$ , 7:  $3.0 \times 10^{-2}$  mol dm<sup>-3</sup>) in H<sub>2</sub>O/DMSO 80:20 v/v.

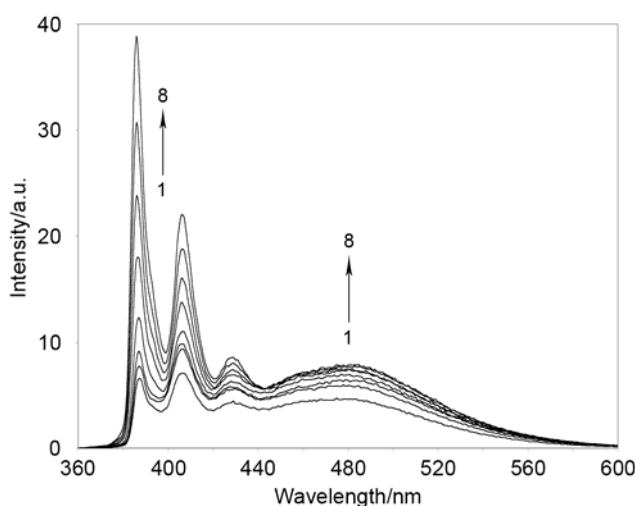

**Figure S 18:** Fluorescence spectra of **1** ( $1.0 \times 10^{-6}$  mol dm<sup>-3</sup>, 25 °C) upon addition of 1-decanol (1: 0, 2:  $2.0 \times 10^{-4}$ , 3:  $4.0 \times 10^{-4}$ , 4:  $6.0 \times 10^{-4}$ , 5:  $8.0 \times 10^{-4}$ , 6:  $1.0 \times 10^{-3}$ , 7:  $1.2 \times 10^{-3}$ , 8:  $1.4 \times 10^{-3}$  mol dm<sup>-3</sup>) in H<sub>2</sub>O/DMSO 80:20 v/v.



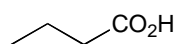

1-butanoic acid

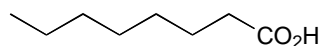

1-heptanoic acid

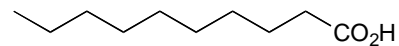

1-decanoic acid

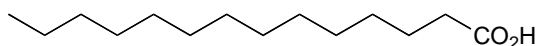

myristic acid

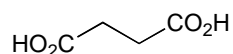

1,4-butanedioic acid

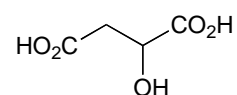

2-hydroxy-1,4-butanedioic acid

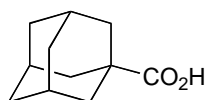

1-adamantylcarboxylic acid

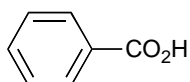

benzoic acid

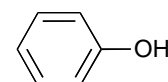

phenol

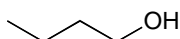

1-butanol

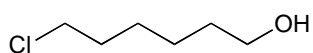

6-chloro-1-hexanol

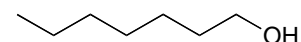

1-heptanol

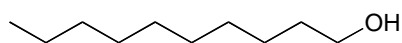

1-decanol

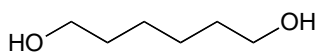

1,6-hexanediol

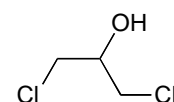

1,3-dichloro-2-propanol

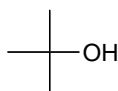

*tert*-butanol

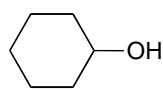

cyclohexanol

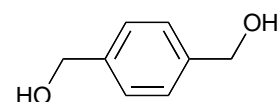

1,4-benzenedimethanol

**Chart S 1:** The various substrates investigated.

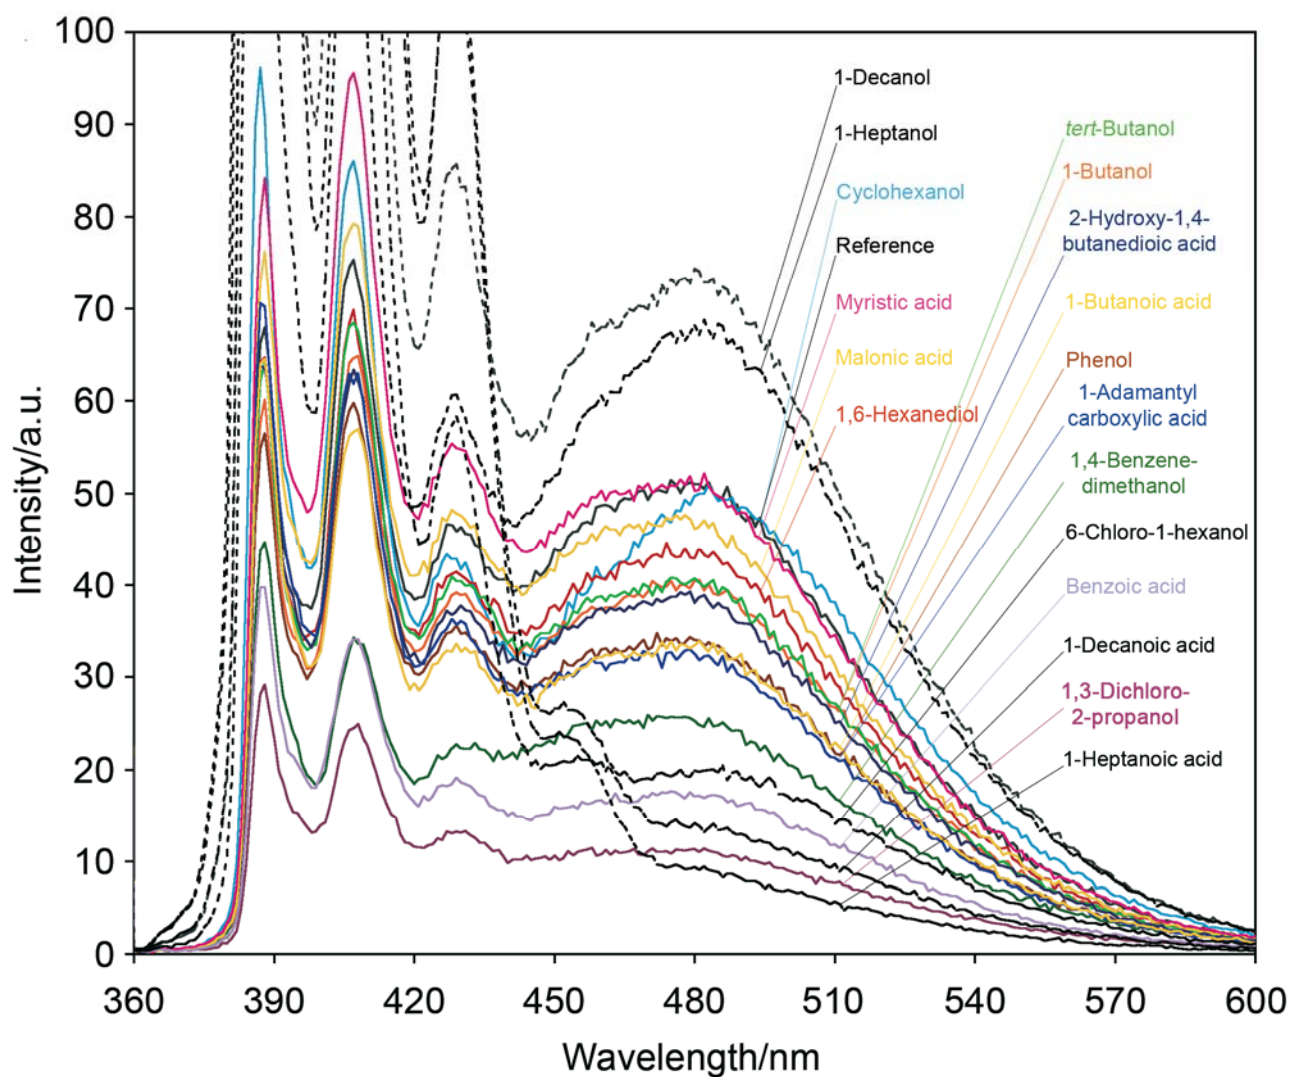

**Figure S 19:** Detail of the stacked plot of the fluorescence spectra of **1** ( $1 \times 10^{-6} \text{ mol dm}^{-3}$ ,  $25 \text{ }^\circ\text{C}$ ) in the presence of the compounds of Chart S 1 in  $\text{H}_2\text{O}/\text{DMSO}$  80:20 v/v. All compounds  $0.1 \text{ mol dm}^{-3}$ , excepted 1,4-benzenedimethanol diol ( $5.0 \times 10^{-2} \text{ mol dm}^{-3}$ ), adamantyl carboxylic acid ( $2.0 \times 10^{-3} \text{ mol dm}^{-3}$ ), and myristic (tetradecanoic) acid ( $5.0 \times 10^{-4} \text{ mol dm}^{-3}$ ).
